# Supplementary material for: Reduced collagen degradation in pelvic urine precedes kidney fibrosis induced by unilateral ureteral obstruction
Source: Research Square preprint supplement (doi:10.21203/rs.3.rs-6872444/v1), 2025-07-01
Supplement: Supplementary file 1 [file c25b8aea4c1c15c21759cb11.xlsx]

## Sheet: Cluster 800 Pelvis (Spearman r)
Peptide ID	22220	21893	23179	17342	17670	20534	20796	16953	14770	18733	20002	27161	18461	14341	15130	16417	27388	1506395	16079	18174	26939	1504911	19711	1505419	14420	9877	7480	11936	4260	1214	1505285	1506370	11678	5132	14373	1505464	7629
22220	1	0.657143	-0.2	0.55	-0.433333	0.35	0.35	1	0.05	0.0666667	0.366667	-0.366667	0.383333	0.366667	0.266667	0.316667	0.15	0.416667	0.25	-0.2	0		0.6	0.214286	0.416667	0.5	0.535714	0.371429		0.3		-0.047619	-0.5	-0.885714	0	0	-0.6
21893	0.657143	1	1	0.2	-0.0285714	0.428571	0.428571		-0.0857143	-0.428571	0.6	-0.142857	0.714286	0.314286	0.542857	-0.0857143	0.314286	-0.0285714	0.0285714	-0.2	0.2		1	0.4	-0.0285714	-0.1	0.5	0.5		-0.0857143		0	-0.6	-0.2	-0.5		-0.5
23179	-0.2	1	1	-0.2	1	-0.2	-0.2		-0.4	-0.8	0.4	-0.2	-0.4	0.2	-0.2	-0.8	-0.2	-0.2	-0.2	0.5	0.5			-0.5	-0.2	-0.5	1	0.5		-0.2		-0.6	-0.2	0.4
17342	0.55	0.2	-0.2	1	0.4	0.318182	0.309091	-1	0.372727	-0.281818	0.209091	0.0727273	0.163636	0.29697	0.0363636	0.0727273	0.354545	0.336364	0.248485	-0.2	-0.190476	-0.5	0.3	0.142857	0.327273	0.3	0.666667	0.314286	-1	0.454545	-0.5	0.454545	-0.142857	-0.714286	0.142857	-0.371429	0.314286
17670	-0.433333	-0.0285714	1	0.4	1	0.472727	0.390909	-1	-0.1	0.0454545	0.227273	-0.109091	0.181818	0.284848	-0.290909	-0.545455	0.172727	0.4	-0.260606	0.257143	0.285714	-1	0.9	-0.0952381	0.236364	0.15	0.238095	0.257143	-0.5	-0.393939	-0.5	0.248485	-0.0357143	0.142857	-0.885714	-0.714286	0.371429
20534	0.35	0.428571	-0.2	0.318182	0.472727	1	0.990909	-0.5	-0.436364	0.509091	0.663636	-0.481818	0.827273	0.551515	-0.463636	-0.454545	0.00909091	0.8	-0.563636	0.714286	0.666667	-0.5	0.6	0.261905	0.845455	0.833333	0.380952	0.714286	-1	-0.709091	-0.5	-0.0787879	-0.785714	-0.828571	-0.6	-0.485714	0.371429
20796	0.35	0.428571	-0.2	0.309091	0.390909	0.990909	1	-0.5	-0.409091	0.490909	0.645455	-0.445455	0.854545	0.551515	-0.445455	-0.4	-0.0272727	0.790909	-0.527273	0.714286	0.666667	-0.5	0.6	0.261905	0.863636	0.866667	0.380952	0.714286	-1	-0.672727	-0.5	-0.139394	-0.785714	-0.828571	-0.6	-0.314286	0.371429
16953	1			-1	-1	-0.5	-0.5	1	0.5	-0.5	0.5	0.5	0.5	-0.5	1	0.5	1	-0.5	0.5					-0.5	-0.5		-0.5			0.5		-1
14770	0.05	-0.0857143	-0.4	0.372727	-0.1	-0.436364	-0.409091	0.5	1	-0.8	-0.136364	0.709091	-0.2	-0.369697	0.763636	0.209091	0.6	-0.536364	0.672727	-0.771429	-0.619048	-0.5	-0.1	-0.619048	-0.363636	-0.266667	-0.166667	-0.428571	-0.5	0.866667	0.5	0.175758	0.75	0.6	0.6	0.542857	0.485714
18733	0.0666667	-0.428571	-0.8	-0.281818	0.0454545	0.509091	0.490909	-0.5	-0.8	1	0.0818182	-0.818182	0.290909	0.490909	-0.763636	-0.245455	-0.627273	0.563636	-0.648485	0.657143	0.142857	0.5	0.1	0.333333	0.572727	0.6	-0.0238095	0.0857143	-1	-0.672727	-0.5	0.127273	-0.464286	-0.428571	-0.657143	-0.428571	0.142857
20002	0.366667	0.6	0.4	0.209091	0.227273	0.663636	0.645455	0.5	-0.136364	0.0818182	1	-0.354545	0.554545	0.0424242	0.00909091	-0.190909	0.3	0.3	-0.490909	0.542857	0.714286	-0.5	0.1	-0.238095	0.481818	0.633333	0.571429	0.828571	-0.5	-0.381818	-0.5	-0.175758	-0.857143	-0.314286	-0.428571	-0.314286	0.371429
27161	-0.366667	-0.142857	-0.2	0.0727273	-0.109091	-0.481818	-0.445455	0.5	0.709091	-0.818182	-0.354545	1	-0.145455	-0.636364	0.6	0.181818	0.5	-0.509091	0.648485	-0.714286	-0.119048	-0.5	-0.3	0	-0.509091	-0.5	-0.333333	-0.6	0.5	0.551515	0.5	-0.0666667	0.857143	0.257143	0.885714	0.485714	-0.314286
18461	0.383333	0.714286	-0.4	0.163636	0.181818	0.827273	0.854545	0.5	-0.2	0.290909	0.554545	-0.145455	1	0.224242	-0.0545455	-0.290909	0.245455	0.654545	-0.2	-0.0285714	0.714286	-0.5	0.7	0.309524	0.718182	0.666667	-0.047619	0.371429	-0.5	-0.490909	0.5	-0.29697	-0.428571	-0.828571	-0.142857	-0.371429	0.257143
14341	0.366667	0.314286	0.2	0.29697	0.284848	0.551515	0.551515	-0.5	-0.369697	0.490909	0.0424242	-0.636364	0.224242	1	-0.515152	-0.551515	-0.321212	0.478788	-0.283333	0.771429	-0.357143	-0.5	0.5	0.285714	0.381818	0.261905	0.25	0.428571	-0.5	-0.433333		-0.0333333	-0.607143	-0.428571	-0.5	-0.9	0.3
15130	0.266667	0.542857	-0.2	0.0363636	-0.290909	-0.463636	-0.445455	1	0.763636	-0.763636	0.00909091	0.6	-0.0545455	-0.515152	1	0.309091	0.754545	-0.454545	0.745455	-0.942857	-0.0714286	-1	-0.1	-0.404762	-0.4	-0.333333	-0.190476	-0.714286	0.5	0.709091	0.5	-0.29697	0.428571	0.371429	0.771429	0.314286	-0.0285714
16417	0.316667	-0.0857143	-0.8	0.0727273	-0.545455	-0.454545	-0.4	0.5	0.209091	-0.245455	-0.190909	0.181818	-0.290909	-0.551515	0.309091	1	-0.0636364	-0.0909091	0.490909	-0.828571	0.0238095	1	-0.3	0.119048	-0.00909091	0.133333	-0.357143	-0.2	1	0.733333	-1	-0.0181818	0.214286	-0.428571	0.371429	0.428571	-0.314286
27388	0.15	0.314286	-0.2	0.354545	0.172727	0.00909091	-0.0272727	1	0.6	-0.627273	0.3	0.5	0.245455	-0.321212	0.754545	-0.0636364	1	-0.0909091	0.6	-0.771429	0.380952	-1	0.1	-0.261905	-0.109091	-0.05	0.119048	-0.6	-0.5	0.466667	0.5	-0.151515	0.535714	0.0857143	0.885714	-0.542857	0.0857143
1506395	0.416667	-0.0285714	-0.2	0.336364	0.4	0.8	0.790909	-0.5	-0.536364	0.563636	0.3	-0.509091	0.654545	0.478788	-0.454545	-0.0909091	-0.0909091	1	-0.10303	-0.0285714	0.714286	0.5	0.7	0.47619	0.881818	0.933333	0.119048	0.485714	-0.5	-0.321212	-0.5	-0.175758	-0.392857	-0.828571	-0.6	-0.714286	-0.0857143
16079	0.25	0.0285714	-0.2	0.248485	-0.260606	-0.563636	-0.527273	0.5	0.672727	-0.648485	-0.490909	0.648485	-0.2	-0.283333	0.745455	0.490909	0.6	-0.10303	1	-0.828571	-0.0714286		0.1	0.25	-0.309091	-0.309524	-0.214286	-0.6		0.818182	-0.5	-0.366667	0.571429	-0.314286	0.885714	0	-0.7
18174	-0.2	-0.2	0.5	-0.2	0.257143	0.714286	0.714286		-0.771429	0.657143	0.542857	-0.714286	-0.0285714	0.771429	-0.942857	-0.828571	-0.771429	-0.0285714	-0.828571	1	0.0857143		-0.4	-0.4	0.0285714	0.1	0.6	0.8		-0.771429		-0.4	-1	0.2	-0.4		0.5
26939	0	0.2	0.5	-0.190476	0.285714	0.666667	0.666667		-0.619048	0.142857	0.714286	-0.119048	0.714286	-0.357143	-0.0714286	0.0238095	0.380952	0.714286	-0.0714286	0.0857143	1		0	0	0.666667	0.642857	0	0.4		-0.380952	-0.5	-0.321429	-0.0285714	-1	0.1	-1	-0.8
1504911				-0.5	-1	-0.5	-0.5		-0.5	0.5	-0.5	-0.5	-0.5	-0.5	-1	1	-1	0.5				1		0.5	0.5							-0.5				0.5
19711	0.6	1		0.3	0.9	0.6	0.6		-0.1	0.1	0.1	-0.3	0.7	0.5	-0.1	-0.3	0.1	0.7	0.1	-0.4	0		1	1	0.2	-0.5	0.1	0.4		0		0	-0.5	-1	-1		-0.5
1505419	0.214286	0.4	-0.5	0.142857	-0.0952381	0.261905	0.261905	-0.5	-0.619048	0.333333	-0.238095	0	0.309524	0.285714	-0.404762	0.119048	-0.261905	0.47619	0.25	-0.4	0	0.5	1	1	0.190476	-0.0285714	0.1	0.3		-0.357143		-0.285714	-0.2	-0.8	0.5	-0.6	-0.8
14420	0.416667	-0.0285714	-0.2	0.327273	0.236364	0.845455	0.863636	-0.5	-0.363636	0.572727	0.481818	-0.509091	0.718182	0.381818	-0.4	-0.00909091	-0.109091	0.881818	-0.309091	0.0285714	0.666667	0.5	0.2	0.190476	1	1	0.047619	0.371429	-0.5	-0.357576	-0.5	-0.127273	-0.535714	-0.885714	-0.657143	-0.0857143	0.371429
9877	0.5	-0.1	-0.5	0.3	0.15	0.833333	0.866667		-0.266667	0.6	0.633333	-0.5	0.666667	0.261905	-0.333333	0.133333	-0.05	0.933333	-0.309524	0.1	0.642857		-0.5	-0.0285714	1	1	0.142857	0.6	-0.5	-0.238095	-0.5	-0.0238095	-0.6	-0.8	-0.6	0.4	0.8
7480	0.535714	0.5	1	0.666667	0.238095	0.380952	0.380952	-0.5	-0.166667	-0.0238095	0.571429	-0.333333	-0.047619	0.25	-0.190476	-0.357143	0.119048	0.119048	-0.214286	0.6	0		0.1	0.1	0.047619	0.142857	1	0.8		-0.0952381		0.119048	-0.6	-0.2	-0.0285714	-0.5	-0.4
11936	0.371429	0.5	0.5	0.314286	0.257143	0.714286	0.714286		-0.428571	0.0857143	0.828571	-0.6	0.371429	0.428571	-0.714286	-0.2	-0.6	0.485714	-0.6	0.8	0.4		0.4	0.3	0.371429	0.6	0.8	1		-0.428571		-0.6	-1	-0.4	-0.4	-0.5
4260				-1	-0.5	-1	-1		-0.5	-1	-0.5	0.5	-0.5	-0.5	0.5	1	-0.5	-0.5							-0.5	-0.5			1			1
1214	0.3	-0.0857143	-0.2	0.454545	-0.393939	-0.709091	-0.672727	0.5	0.866667	-0.672727	-0.381818	0.551515	-0.490909	-0.433333	0.709091	0.733333	0.466667	-0.321212	0.818182	-0.771429	-0.380952		0	-0.357143	-0.357576	-0.238095	-0.0952381	-0.428571		1	-1	0.0166667	0.642857	-0.0285714	0.6	0.6	-0.3
1505285				-0.5	-0.5	-0.5	-0.5		0.5	-0.5	-0.5	0.5	0.5		0.5	-1	0.5	-0.5	-0.5		-0.5				-0.5	-0.5				-1	1
1506370	-0.047619	0	-0.6	0.454545	0.248485	-0.0787879	-0.139394	-1	0.175758	0.127273	-0.175758	-0.0666667	-0.29697	-0.0333333	-0.29697	-0.0181818	-0.151515	-0.175758	-0.366667	-0.4	-0.321429	-0.5	0	-0.285714	-0.127273	-0.0238095	0.119048	-0.6	1	0.0166667		1	0.0857143	0.3	-0.371429	0.3	0.6
11678	-0.5	-0.6	-0.2	-0.142857	-0.0357143	-0.785714	-0.785714		0.75	-0.464286	-0.857143	0.857143	-0.428571	-0.607143	0.428571	0.214286	0.535714	-0.392857	0.571429	-1	-0.0285714		-0.5	-0.2	-0.535714	-0.6	-0.6	-1		0.642857		0.0857143	1	0.2	1	0.5	-0.5
5132	-0.885714	-0.2	0.4	-0.714286	0.142857	-0.828571	-0.828571		0.6	-0.428571	-0.314286	0.257143	-0.828571	-0.428571	0.371429	-0.428571	0.0857143	-0.828571	-0.314286	0.2	-1		-1	-0.8	-0.885714	-0.8	-0.2	-0.4		-0.0285714		0.3	0.2	1	-0.5	0.4	0.8
14373	0	-0.5		0.142857	-0.885714	-0.6	-0.6		0.6	-0.657143	-0.428571	0.885714	-0.142857	-0.5	0.771429	0.371429	0.885714	-0.6	0.885714	-0.4	0.1		-1	0.5	-0.657143	-0.6	-0.0285714	-0.4		0.6		-0.371429	1	-0.5	1		-1
1505464	0			-0.371429	-0.714286	-0.485714	-0.314286		0.542857	-0.428571	-0.314286	0.485714	-0.371429	-0.9	0.314286	0.428571	-0.542857	-0.714286	0		-1	0.5		-0.6	-0.0857143	0.4	-0.5	-0.5		0.6		0.3	0.5	0.4		1	0.5
7629	-0.6	-0.5		0.314286	0.371429	0.371429	0.371429		0.485714	0.142857	0.371429	-0.314286	0.257143	0.3	-0.0285714	-0.314286	0.0857143	-0.0857143	-0.7	0.5	-0.8		-0.5	-0.8	0.371429	0.8	-0.4			-0.3		0.6	-0.5	0.8	-1	0.5	1

## Sheet: Cluster 800 Pelvis (P value)
peptide ID	22220	21893	23179	17342	17670	20534	20796	16953	14770	18733	20002	27161	18461	14341	15130	16417	27388	1506395	16079	18174	26939	1504911	19711	1505419	14420	9877	7480	11936	4260	1214	1505285	1506370	11678	5132	14373	1505464	7629
22220		0.175	0.916667	0.132777	0.249917	0.358581	0.358581	0.333333	0.911618	0.880093	0.33626	0.33626	0.3125	0.33626	0.493331	0.41008	0.708069	0.269582	0.520635	0.713889	1		0.35	0.661508	0.269582	0.266667	0.235714	0.497222		0.436624		0.934871	0.266667	0.0333333	1	1	0.416667
21893	0.175		0.333333	0.713889	1	0.419444	0.419444		0.919444	0.419444	0.241667	0.802778	0.136111	0.563889	0.297222	0.919444	0.563889	1	1	0.783333	0.713889		0.333333	0.516667	1	0.95	0.45	1		0.919444		1	0.35	0.916667	1		1
23179	0.916667	0.333333		0.916667	0.0833333	0.916667	0.916667		0.75	0.333333	0.75	0.916667	0.75	0.916667	0.916667	0.333333	0.916667	0.916667	0.916667	1	1			1	0.916667	1	0.333333	1		0.916667		0.416667	0.916667	0.75
17342	0.132777	0.713889	0.916667		0.224952	0.341517	0.355967	0.333333	0.26075	0.402349	0.539314	0.838493	0.633662	0.406912	0.924139	0.838493	0.286222	0.313186	0.491768	0.713889	0.664583	1	0.683333	0.752034	0.326857	0.436624	0.0830853	0.563889	0.333333	0.19124	1	0.19124	0.78254	0.136111	0.802778	0.497222	0.563889
17670	0.249917	1	0.0833333	0.224952		0.145713	0.236622	0.333333	0.775854	0.903251	0.503396	0.754517	0.595046	0.427082	0.386337	0.0876368	0.614656	0.224952	0.46973	0.658333	0.500794	0.333333	0.0833333	0.840129	0.485354	0.708069	0.582143	0.658333	1	0.26316	1	0.491768	0.963492	0.802778	0.0333333	0.136111	0.497222
20534	0.358581	0.419444	0.916667	0.341517	0.145713		5.51146e-07	1	0.182568	0.114179	0.0306113	0.137529	0.00272888	0.104883	0.154576	0.163496	0.989466	0.00465193	0.0962787	0.136111	0.0830853	1	0.35	0.536409	0.00182585	0.0082672	0.359871	0.136111	0.333333	0.0267521	1	0.838226	0.0480159	0.0583333	0.241667	0.355556	0.497222
20796	0.358581	0.419444	0.916667	0.355967	0.236622	5.51146e-07		1	0.214077	0.129365	0.0368481	0.17304	0.00145979	0.104883	0.17304	0.224952	0.946204	0.00549127	0.123102	0.136111	0.0830853	1	0.35	0.536409	0.00115781	0.00450838	0.359871	0.136111	0.333333	0.0389672	1	0.707164	0.0480159	0.0583333	0.241667	0.563889	0.497222
16953	0.333333			0.333333	0.333333	1	1		1	1	1	1	1	1	0.333333	1	0.333333	1	1					1	1		1			1		0.333333
14770	0.911618	0.919444	0.75	0.26075	0.775854	0.182568	0.214077	1		0.00465193	0.693713	0.0181946	0.557412	0.29566	0.00857403	0.539314	0.0562284	0.0939164	0.0389672	0.102778	0.11498	1	0.95	0.11498	0.27305	0.493331	0.703323	0.419444	1	0.00217317	1	0.632142	0.0662698	0.241667	0.241667	0.297222	0.355556
18733	0.880093	0.419444	0.333333	0.402349	0.903251	0.114179	0.129365	1	0.00465193		0.817929	0.00329926	0.386337	0.154822	0.00857403	0.468404	0.0439863	0.0760923	0.0489787	0.175	0.752034	1	0.95	0.427877	0.0708157	0.0967978	0.976786	0.919444	0.333333	0.0389672	1	0.733007	0.302381	0.419444	0.175	0.419444	0.802778
20002	0.33626	0.241667	0.75	0.539314	0.503396	0.0306113	0.0368481	1	0.693713	0.817929		0.286222	0.081814	0.918376	0.989466	0.576535	0.371335	0.371335	0.154822	0.297222	0.0575893	1	0.95	0.582143	0.137529	0.0760362	0.151141	0.0583333	1	0.278828	1	0.632142	0.0238095	0.563889	0.419444	0.563889	0.497222
27161	0.33626	0.802778	0.916667	0.838493	0.754517	0.137529	0.17304	1	0.0181946	0.00329926	0.286222		0.673116	0.0544307	0.0562284	0.595046	0.121732	0.114179	0.0489787	0.136111	0.793006	1	0.683333	1	0.114179	0.177662	0.427877	0.241667	1	0.104883	1	0.865144	0.0238095	0.658333	0.0333333	0.355556	0.563889
18461	0.3125	0.136111	0.75	0.633662	0.595046	0.00272888	0.00145979	1	0.557412	0.386337	0.081814	0.673116		0.536661	0.881201	0.386337	0.468404	0.0335849	0.583658	1	0.0575893	1	0.233333	0.461806	0.0162335	0.05889	0.934871	0.497222	1	0.154822	1	0.406912	0.353571	0.0583333	0.802778	0.497222	0.658333
14341	0.33626	0.563889	0.916667	0.406912	0.427082	0.104883	0.104883	1	0.29566	0.154822	0.918376	0.0544307	0.536661		0.133401	0.104883	0.367892	0.166283	0.462991	0.102778	0.444444	1	0.45	0.500794	0.278828	0.536409	0.594841	0.419444	1	0.249917		0.948391	0.166667	0.419444	0.45	0.0833333	0.683333
15130	0.493331	0.297222	0.916667	0.924139	0.386337	0.154576	0.17304	0.333333	0.00857403	0.00857403	0.989466	0.0562284	0.881201	0.133401		0.355967	0.00984598	0.163496	0.0174058	0.0166667	0.881994	0.333333	0.95	0.326835	0.224952	0.385323	0.664583	0.136111	1	0.0267521	1	0.406912	0.353571	0.497222	0.102778	0.563889	1
16417	0.41008	0.919444	0.333333	0.838493	0.0876368	0.163496	0.224952	1	0.539314	0.468404	0.576535	0.595046	0.386337	0.104883	0.355967		0.860333	0.796393	0.154822	0.0583333	0.976786	0.333333	0.683333	0.793006	0.989466	0.743541	0.389385	0.713889	0.333333	0.0202331	0.333333	0.97296	0.661508	0.419444	0.497222	0.419444	0.563889
27388	0.708069	0.563889	0.916667	0.286222	0.614656	0.989466	0.946204	0.333333	0.0562284	0.0439863	0.371335	0.121732	0.468404	0.367892	0.00984598	0.860333		0.796393	0.0734265	0.102778	0.359871	0.333333	0.95	0.536409	0.754517	0.911618	0.793006	0.241667	1	0.17862	1	0.682089	0.235714	0.919444	0.0333333	0.297222	0.919444
1506395	0.269582	1	0.916667	0.313186	0.224952	0.00465193	0.00549127	1	0.0939164	0.0760923	0.371335	0.114179	0.0335849	0.166283	0.163496	0.796393	0.796393		0.785023	1	0.0575893	1	0.233333	0.243056	0.000694344	0.000749559	0.793006	0.355556	1	0.367892	1	0.632142	0.395635	0.0583333	0.241667	0.136111	0.919444
16079	0.520635	1	0.916667	0.491768	0.46973	0.0962787	0.123102	1	0.0389672	0.0489787	0.154822	0.0489787	0.583658	0.462991	0.0174058	0.154822	0.0734265	0.785023		0.0583333	0.881994		0.95	0.594841	0.386906	0.461806	0.619097	0.241667		0.00581845	1	0.33626	0.2	0.563889	0.0333333	1	0.233333
18174	0.713889	0.783333	1	0.713889	0.658333	0.136111	0.136111		0.102778	0.175	0.297222	0.136111	1	0.102778	0.0166667	0.0583333	0.102778	1	0.0583333		0.919444		0.75	0.75	1	0.95	0.35	0.333333		0.102778		0.516667	0.0166667	0.916667	0.75		1
26939	1	0.713889	1	0.664583	0.500794	0.0830853	0.0830853		0.11498	0.752034	0.0575893	0.793006	0.0575893	0.444444	0.881994	0.976786	0.359871	0.0575893	0.881994	0.919444			1	1	0.0830853	0.138889	1	0.75		0.359871	1	0.497619	1	0.0833333	0.95	0.333333	0.333333
1504911				1	0.333333	1	1		1	1	1	1	1	1	0.333333	0.333333	0.333333	1						1	1							1				1
19711	0.35	0.333333		0.683333	0.0833333	0.35	0.35		0.95	0.95	0.95	0.683333	0.233333	0.45	0.95	0.683333	0.95	0.233333	0.95	0.75	1			0.333333	0.783333	1	0.95	0.75		1		1	1	0.333333	0.0833333		1
1505419	0.661508	0.516667	1	0.752034	0.840129	0.536409	0.536409	1	0.11498	0.427877	0.582143	1	0.461806	0.500794	0.326835	0.793006	0.536409	0.243056	0.594841	0.75	1	1	0.333333		0.664583	1	0.95	0.683333		0.444444		0.555952	0.783333	0.133333	1	0.35	0.333333
14420	0.269582	1	0.916667	0.326857	0.485354	0.00182585	0.00115781	1	0.27305	0.0708157	0.137529	0.114179	0.0162335	0.278828	0.224952	0.989466	0.754517	0.000694344	0.386906	1	0.0830853	1	0.783333	0.664583		5.51146e-06	0.934871	0.497222	1	0.312895	1	0.733007	0.235714	0.0333333	0.175	0.919444	0.497222
9877	0.266667	0.95	1	0.436624	0.708069	0.0082672	0.00450838		0.493331	0.0967978	0.0760362	0.177662	0.05889	0.536409	0.385323	0.743541	0.911618	0.000749559	0.461806	0.95	0.138889		1	1	5.51146e-06		0.802778	0.416667	1	0.582143	1	0.976786	0.241667	0.333333	0.35	0.75	0.333333
7480	0.235714	0.45	0.333333	0.0830853	0.582143	0.359871	0.359871	1	0.703323	0.976786	0.151141	0.427877	0.934871	0.594841	0.664583	0.389385	0.793006	0.793006	0.619097	0.35	1		0.95	0.95	0.934871	0.802778		0.133333		0.840129		0.793006	0.35	0.916667	1	1	0.75
11936	0.497222	1	1	0.563889	0.658333	0.136111	0.136111		0.419444	0.919444	0.0583333	0.241667	0.497222	0.419444	0.136111	0.713889	0.241667	0.355556	0.241667	0.333333	0.75		0.75	0.683333	0.497222	0.416667	0.133333			0.419444		0.241667	0.0833333	0.75	0.75	1
4260				0.333333	1	0.333333	0.333333		1	0.333333	1	1	1	1	1	0.333333	1	1							1	1						0.333333
1214	0.436624	0.919444	0.916667	0.19124	0.26316	0.0267521	0.0389672	1	0.00217317	0.0389672	0.278828	0.104883	0.154822	0.249917	0.0267521	0.0202331	0.17862	0.367892	0.00581845	0.102778	0.359871		1	0.444444	0.312895	0.582143	0.840129	0.419444			0.333333	0.98157	0.138889	1	0.241667	0.35	0.683333
1505285				1	1	1	1		1	1	1	1	1		1	0.333333	1	1	1		1				1	1				0.333333
1506370	0.934871	1	0.416667	0.19124	0.491768	0.838226	0.707164	0.333333	0.632142	0.733007	0.632142	0.865144	0.406912	0.948391	0.406912	0.97296	0.682089	0.632142	0.33626	0.516667	0.497619	1	1	0.555952	0.733007	0.976786	0.793006	0.241667	0.333333	0.98157			0.919444	0.683333	0.497222	0.683333	0.35
11678	0.266667	0.35	0.916667	0.78254	0.963492	0.0480159	0.0480159		0.0662698	0.302381	0.0238095	0.0238095	0.353571	0.166667	0.353571	0.661508	0.235714	0.395635	0.2	0.0166667	1		1	0.783333	0.235714	0.241667	0.35	0.0833333		0.138889		0.919444		0.783333	0.333333	1	1
5132	0.0333333	0.916667	0.75	0.136111	0.802778	0.0583333	0.0583333		0.241667	0.419444	0.563889	0.658333	0.0583333	0.419444	0.497222	0.419444	0.919444	0.0583333	0.563889	0.916667	0.0833333		0.333333	0.133333	0.0333333	0.333333	0.916667	0.75		1		0.683333	0.783333		1	0.75	0.333333
14373	1	1		0.802778	0.0333333	0.241667	0.241667		0.241667	0.175	0.419444	0.0333333	0.802778	0.45	0.102778	0.497222	0.0333333	0.241667	0.0333333	0.75	0.95		0.0833333	1	0.175	0.35	1	0.75		0.241667		0.497222	0.333333	1			0.333333
1505464	1			0.497222	0.136111	0.355556	0.563889		0.297222	0.419444	0.563889	0.355556	0.497222	0.0833333	0.563889	0.419444	0.297222	0.136111	1		0.333333	1		0.35	0.919444	0.75	1	1		0.35		0.683333	1	0.75			0.45
7629	0.416667	1		0.563889	0.497222	0.497222	0.497222		0.355556	0.802778	0.497222	0.563889	0.658333	0.683333	1	0.563889	0.919444	0.919444	0.233333	1	0.333333		1	0.333333	0.497222	0.333333	0.75			0.683333		0.35	1	0.333333	0.333333	0.45

## Sheet: Cluster 800 bladder (Spearman r
Peptide ID	1504804	22220	21893	23484	23179	1504736	29788	17342	17670	20534	20796	16953	1506112	28549	14770	18733	20002	27161	18461	14341	15130	16417	27388	1506395	16079	18174	26939	1504911	9232	1506221	1504723	30305	30085	15699	1505419	14420	9877	14045	7480	11936	4260	1214	1505373	1506370	1500897	11678	14373	1505637	1505464
1504804	1	0.371429	0.2	-0.0285714	0	0.0285714	0.828571	0.0285714	0.314286	-0.314286	-0.0285714	-0.8	0.2	0.714286	-0.142857	-0.142857	-0.0857143	0.542857	-0.2		-0.0285714	0.0857143	0.485714	0.142857	0.6	-0.2	0.0857143	0	0.542857	0.5	0.885714	0.7	0.828571	-0.5	-0.0285714	0.142857	-0.257143	0.1	0.1	-0.142857	0.0285714	-0.6		0.2	-0.2	0	0.6	-0.371429
22220	0.371429	1	0.818182	0.369697	-0.257143	-0.15	0.0424242	-0.118182	-0.1	0.345455	0.427273	0.1	-0.142857	0.214286	-0.0181818	0.0363636	0.118182	0.554545	-0.418182	0.5	-0.209091	0.163636	0.709091	-0.4	0.518182	-0.00909091	0.509091	0.285714	0.69697	0.771429	0.0181818	0.248485	-0.0666667	1	0.572727	-0.581818	-0.327273	-0.10303	-0.464286	0.454545	-0.363636	-0.357576	1	-0.172727	0.145455	0.0285714	0.490909	0.372727	-0.5
21893	0.2	0.818182	1	0.709091	-0.485714	-0.433333	-0.333333	0.154545	0.154545	0.318182	0.372727	0.6	-0.0857143	0.0952381	0.281818	-0.0545455	0.209091	0.509091	-0.212121	0.5	-0.0909091	-0.118182	0.772727	-0.372727	0.509091	-0.281818	0.536364	0	0.539394	0.257143	-0.0666667	0.175758	-0.212121	0.8	0.427273	-0.627273	-0.409091	0.187879	-0.5	0.536364	-0.354545	-0.2	1	-0.472727	0.0909091	0.142857	0.627273	0.627273	-0.5
23484	-0.0285714	0.369697	0.709091	1	0.142857	-0.816667	-0.587879	-0.151515	-0.139394	0.127273	0.260606	0.5	0.885714	-0.333333	0.660606	-0.151515	0.369697	0.2	-0.0833333		0.321212	0.260606	0.709091	0.115152	0.612121	-0.175758	0.163636	0.309524	0.0333333	0.0285714	-0.309091	-0.433333	-0.515152	0.4	0.345455	-0.793939	-0.393939	0.25	-0.142857	0.454545	0.10303	-0.183333		-0.381818	0.0181818	-0.714286	0.624242	0.769697
23179	0	-0.257143	-0.485714	0.142857	1	-0.0857143	0.257143	-0.771429	-0.771429	-0.542857	-0.657143	-0.8	0.6	0.371429	0.6	-0.2	0.2	-0.0285714	0.142857		1	0.6	0.142857	-0.257143	-0.0285714	-0.885714	0.257143	0.6	-0.0285714	-1	0.428571	-0.1	0.257143		-0.542857	-0.828571	-0.942857	-1	0.8	-0.828571	0.0857143	-0.3		-0.714286	0.657143	0.4	0.6	0.485714
1504736	0.0285714	-0.15	-0.433333	-0.816667	-0.0857143	1	0.683333	0.266667	0.333333	-0.466667	-0.35	-0.7	-0.657143	0.47619	-0.433333	0.0333333	-0.383333	0.133333	-0.0952381		-0.183333	-0.433333	-0.516667	-0.516667	-0.233333	-0.283333	0.316667	-0.785714	-0.119048	-0.3	0.483333	0.47619	0.516667	0.5	-0.0166667	0.5	0.25	0.142857	-0.314286	-0.05	-0.3	0.428571		0.4	0.516667	0.7	-0.616667	-0.75
29788	0.828571	0.0424242	-0.333333	-0.587879	0.257143	0.683333	1	-0.139394	0.0424242	-0.175758	-0.151515	-0.7	-0.257143	0.928571	-0.260606	-0.163636	-0.369697	0.490909	-0.233333		0.0909091	0.0545455	-0.10303	-0.381818	-0.0787879	-0.260606	0.454545	-0.047619	0.5	0.0857143	0.854545	0.866667	0.915152	0	-0.29697	0.309091	-0.163636	-0.333333	-0.142857	-0.466667	-0.333333	0.266667		0.260606	0.2	0.657143	-0.0666667	-0.636364
17342	0.0285714	-0.118182	0.154545	-0.151515	-0.771429	0.266667	-0.139394	1	0.963636	0.181818	0.254545	0.5	-0.428571	-0.285714	-0.136364	-0.163636	-0.109091	0.3	-0.10303	-0.5	-0.509091	-0.436364	0.127273	0.0545455	-0.0636364	-0.209091	0.154545	-0.52381	0.0666667	0.0857143	0.127273	0.0424242	0.0545455	0.8	-0.0454545	0.290909	0.427273	0.418182	-0.571429	0.1	0.0363636	0.321212	-0.5	0.181818	-0.136364	-0.0285714	-0.136364	-0.109091	-1
17670	0.314286	-0.1	0.154545	-0.139394	-0.771429	0.333333	0.0424242	0.963636	1	0.136364	0.236364	0.3	-0.428571	0	-0.0818182	-0.145455	-0.118182	0.354545	-0.127273	-0.5	-0.372727	-0.390909	0.109091	0.00909091	0.0272727	-0.254545	0.2	-0.47619	0.139394	0.0857143	0.321212	0.139394	0.236364	1	-0.0454545	0.345455	0.336364	0.527273	-0.607143	0.1	-0.0454545	0.406061	-0.5	0.245455	-0.190909	-0.0285714	-0.118182	-0.236364	-0.5
20534	-0.314286	0.345455	0.318182	0.127273	-0.542857	-0.466667	-0.175758	0.181818	0.136364	1	0.845455	0.6	0.2	-0.190476	-0.0818182	-0.354545	-0.218182	0.345455	-0.29697	-0.5	-0.0454545	0.181818	0.381818	0.0272727	-0.181818	-0.0363636	0.245455	0.714286	0.490909	0.371429	-0.224242	0.442424	-0.2	0.4	-0.181818	-0.1	-0.163636	-0.115152	-0.678571	0.136364	-0.527273	0.0424242	0.5	0.00909091	-0.390909	0.257143	0.109091	0.154545	-0.5
20796	-0.0285714	0.427273	0.372727	0.260606	-0.657143	-0.35	-0.151515	0.254545	0.236364	0.845455	1	0.7	0.142857	-0.285714	0.0636364	-0.1	0.118182	0.390909	-0.175758	0.5	-0.109091	0.318182	0.490909	0.2	0.1	0.245455	0.163636	0.642857	0.406061	0.885714	-0.139394	0.030303	-0.224242	0.8	0.163636	-0.136364	0.0727273	0.212121	-0.75	0.263636	-0.254545	0.0545455	0.5	0.318182	-0.527273	0.0857143	0.0454545	0.0363636	-1
16953	-0.8	0.1	0.6	0.5	-0.8	-0.7	-0.7	0.5	0.3	0.6	0.7	1		-0.7	0.5	0.4	0.7	0.1	0.6		-0.6	-0.6	0.5	0	-0.5	0.7	0.1	0.4	-0.1		-0.7	-0.8	-0.6		-0.1	-0.1	0.6	0.6	-0.8	0.1	0.1	0.4		-0.3	-0.9		0	1
1506112	0.2	-0.142857	-0.0857143	0.885714	0.6	-0.657143	-0.257143	-0.428571	-0.428571	0.2	0.142857		1	0	0.485714	-0.714286	-0.0857143	0.371429	0.1		0.257143	0.0857143	0.542857	0.485714	-0.0285714	-0.314286	0.257143	0.9	0.5	0.3	0.0857143	-0.0857143	-0.371429		-0.257143	-0.657143	-0.371429	-0.8	0.8	-0.2	-0.0285714	-0.485714		-0.542857	0.0285714	-0.8	0.6	0.485714
28549	0.714286	0.214286	0.0952381	-0.333333	0.371429	0.47619	0.928571	-0.285714	0	-0.190476	-0.285714	-0.7	0	1	0.0714286	-0.214286	-0.452381	0.380952	-0.0952381		0.666667	-0.047619	-0.0952381	-0.595238	0.166667	-0.714286	0.571429	-0.285714	0.5	-0.4	0.857143	1	0.857143	0.5	-0.238095	0.047619	-0.714286	0.178571	-0.428571	-0.0714286	-0.714286	0.321429		-0.190476	0.119048	0.7	0.0952381	-0.452381
14770	-0.142857	-0.0181818	0.281818	0.660606	0.6	-0.433333	-0.260606	-0.136364	-0.0818182	-0.0818182	0.0636364	0.5	0.485714	0.0714286	1	0.245455	0.627273	-0.0636364	0.357576	0.5	0.736364	0.109091	0.281818	-0.309091	0.245455	-0.190909	0.154545	0.0952381	-0.418182	-0.542857	-0.10303	-0.357576	-0.0424242	0.4	0.0909091	-0.472727	-0.490909	0.406061	-0.178571	-0.00909091	0.00909091	0.563636	-0.5	-0.354545	0.0545455	0.428571	0.309091	0.472727	-0.5
18733	-0.142857	0.0363636	-0.0545455	-0.151515	-0.2	0.0333333	-0.163636	-0.163636	-0.145455	-0.354545	-0.1	0.4	-0.714286	-0.214286	0.245455	1	0.818182	-0.554545	0.636364	0.5	0.1	0.0636364	-0.218182	0.00909091	0.00909091	0.709091	-0.481818	-0.47619	-0.551515	0.314286	-0.309091	-0.612121	-0.10303	0.4	0.5	0.172727	0.290909	0.369697	-0.0357143	-0.0909091	0.427273	0.248485	-0.5	0.172727	-0.281818	0.257143	-0.136364	-0.1	-0.5
20002	-0.0857143	0.118182	0.209091	0.369697	0.2	-0.383333	-0.369697	-0.109091	-0.118182	-0.218182	0.118182	0.7	-0.0857143	-0.452381	0.627273	0.818182	1	-0.281818	0.69697	0.5	0.227273	0.0181818	0.145455	-0.0636364	0.118182	0.490909	-0.181818	0.0238095	-0.454545	0.314286	-0.284848	-0.745455	-0.260606	0.8	0.427273	-0.172727	0.109091	0.442424	0.107143	-0.0636364	0.372727	0.321212	-0.5	-0.0545455	-0.218182	0.371429	0.0727273	0.227273	-0.5
27161	0.542857	0.554545	0.509091	0.2	-0.0285714	0.133333	0.490909	0.3	0.354545	0.345455	0.390909	0.1	0.371429	0.380952	-0.0636364	-0.554545	-0.281818	1	-0.490909	0.5	-0.263636	-0.0636364	0.709091	-0.390909	0.345455	-0.527273	0.863636	0.547619	0.878788	0.6	0.709091	0.563636	0.442424	0.4	-0.0272727	-0.363636	-0.281818	-0.163636	-0.464286	0.0636364	-0.427273	-0.10303	0.5	-0.0727273	0.272727	0.142857	0.372727	0.109091	-0.5
18461	-0.2	-0.418182	-0.212121	-0.0833333	0.142857	-0.0952381	-0.233333	-0.10303	-0.127273	-0.29697	-0.175758	0.6	0.1	-0.0952381	0.357576	0.636364	0.69697	-0.490909	1	0.5	0.248485	-0.527273	-0.430303	-0.0666667	-0.527273	0.260606	-0.175758	-0.214286	-0.478788	-0.1	-0.1	-0.483333	-0.15	-0.2	-0.248485	0.345455	0.248485	0.4	0.142857	-0.284848	0.0909091	0.433333		-0.260606	-0.309091	0.828571	-0.333333	-0.0545455	0.5
14341		0.5	0.5					-0.5	-0.5	-0.5	0.5				0.5	0.5	0.5	0.5	0.5	1	0.5	-0.5	0.5	-1	0.5	0.5	0.5		0.5						1	-0.5	-1	-0.5	-0.5	-0.5	-0.5			-0.5	0.5		0.5	0.5
15130	-0.0285714	-0.209091	-0.0909091	0.321212	1	-0.183333	0.0909091	-0.509091	-0.372727	-0.0454545	-0.109091	-0.6	0.257143	0.666667	0.736364	0.1	0.227273	-0.263636	0.248485	0.5	1	0.290909	-0.118182	-0.209091	0.0454545	-0.190909	-0.0272727	0.0714286	-0.321212	-0.828571	0.030303	-0.030303	0.236364	0.2	-0.209091	-0.172727	-0.645455	0.272727	-0.357143	-0.127273	-0.227273	0.478788	-0.5	-0.236364	-0.0727273	0.657143	0.145455	0.118182	0.5
16417	0.0857143	0.163636	-0.118182	0.260606	0.6	-0.433333	0.0545455	-0.436364	-0.390909	0.181818	0.318182	-0.6	0.0857143	-0.047619	0.109091	0.0636364	0.0181818	-0.0636364	-0.527273	-0.5	0.290909	1	0.254545	0.263636	0.518182	0.363636	-0.318182	0.547619	-0.030303	0.542857	-0.224242	-0.175758	-0.0909091	0.4	0.436364	-0.345455	-0.245455	-0.236364	0.107143	-0.0272727	0.3	-0.212121	0.5	0.409091	-0.109091	-0.314286	0.281818	0.0272727	-1
27388	0.485714	0.709091	0.772727	0.709091	0.142857	-0.516667	-0.10303	0.127273	0.109091	0.381818	0.490909	0.5	0.542857	-0.0952381	0.281818	-0.218182	0.145455	0.709091	-0.430303	0.5	-0.118182	0.254545	1	-0.3	0.618182	-0.272727	0.563636	0.547619	0.515152	0.828571	0.0787879	0.10303	-0.0545455	0.4	0.372727	-0.772727	-0.454545	-0.139394	-0.178571	0.118182	-0.0727273	-0.321212	1	-0.3	0.209091	-0.142857	0.790909	0.636364	-0.5
1506395	0.142857	-0.4	-0.372727	0.115152	-0.257143	-0.516667	-0.381818	0.0545455	0.00909091	0.0272727	0.2	0	0.485714	-0.595238	-0.309091	0.00909091	-0.0636364	-0.390909	-0.0666667	-1	-0.209091	0.263636	-0.3	1	-0.00909091	0.554545	-0.727273	0.261905	-0.0909091	0.428571	-0.333333	-0.551515	-0.490909	-1	0.0454545	0.4	0.581818	0.2	0.142857	0.145455	0.490909	-0.381818	-1	0.545455	-0.645455	-0.885714	-0.3	-0.363636	-0.5
16079	0.6	0.518182	0.509091	0.612121	-0.0285714	-0.233333	-0.0787879	-0.0636364	0.0272727	-0.181818	0.1	-0.5	-0.0285714	0.166667	0.245455	0.00909091	0.118182	0.345455	-0.527273	0.5	0.0454545	0.518182	0.618182	-0.00909091	1	-0.0545455	0.118182	0.047619	0.260606	0.428571	0.0545455	-0.139394	-0.0545455	0.4	0.736364	-0.6	-0.318182	0.151515	-0.178571	0.390909	0.245455	-0.393939	0.5	0.0909091	0.181818	-0.542857	0.609091	0.272727	-0.5
18174	-0.2	-0.00909091	-0.281818	-0.175758	-0.885714	-0.283333	-0.260606	-0.209091	-0.254545	-0.0363636	0.245455	0.7	-0.314286	-0.714286	-0.190909	0.709091	0.490909	-0.527273	0.260606	0.5	-0.190909	0.363636	-0.272727	0.554545	-0.0545455	1	-0.709091	0.142857	-0.272727	0.771429	-0.515152	-0.587879	-0.454545	-0.2	0.463636	0.3	0.609091	0.10303	0.285714	0.0272727	0.509091	-0.115152	-0.5	0.590909	-0.545455	-0.257143	-0.363636	-0.336364	-0.5
26939	0.0857143	0.509091	0.536364	0.163636	0.257143	0.316667	0.454545	0.154545	0.2	0.245455	0.163636	0.1	0.257143	0.571429	0.154545	-0.481818	-0.181818	0.863636	-0.175758	0.5	-0.0272727	-0.318182	0.563636	-0.727273	0.118182	-0.709091	1	0.261905	0.660606	-0.0857143	0.648485	0.612121	0.466667	0.8	-0.190909	-0.427273	-0.472727	-0.175758	-0.321429	0.0454545	-0.645455	0.127273	0.5	-0.409091	0.481818	0.771429	0.309091	0.272727	0.5
1504911	0	0.285714	0	0.309524	0.6	-0.785714	-0.047619	-0.52381	-0.47619	0.714286	0.642857	0.4	0.9	-0.285714	0.0952381	-0.47619	0.0238095	0.547619	-0.214286		0.0714286	0.547619	0.547619	0.261905	0.047619	0.142857	0.261905	1	0.404762	0.4	-0.0952381	-0.0238095	-0.190476	0	-0.238095	-0.452381	-0.0952381	-0.714286	0.2	-0.214286	-0.0238095	-0.214286		0.119048	-0.214286	-0.4	0.190476	0.190476
9232	0.542857	0.69697	0.539394	0.0333333	-0.0285714	-0.119048	0.5	0.0666667	0.139394	0.490909	0.406061	-0.1	0.5	0.5	-0.418182	-0.551515	-0.454545	0.878788	-0.478788	0.5	-0.321212	-0.030303	0.515152	-0.0909091	0.260606	-0.272727	0.660606	0.404762	1	0.9	0.633333	0.733333	0.383333	0	-0.10303	-0.212121	-0.236364	-0.216667	-0.428571	0.2	-0.563636	-0.45		-0.030303	-0.115152	0.0857143	0.284848	-0.00606061	0.5
1506221	0.5	0.771429	0.257143	0.0285714	-1	-0.3	0.0857143	0.0857143	0.0857143	0.371429	0.885714		0.3	-0.4	-0.542857	0.314286	0.314286	0.6	-0.1		-0.828571	0.542857	0.828571	0.428571	0.428571	0.771429	-0.0857143	0.4	0.9	1	0.0857143	-0.257143	-0.371429		0.6	-0.0857143	0.828571	0.0285714	0.2	0.257143	0.257143	-0.371429		0.6	-0.6	-0.4	0.0285714	-0.542857
1504723	0.885714	0.0181818	-0.0666667	-0.309091	0.428571	0.483333	0.854545	0.127273	0.321212	-0.224242	-0.139394	-0.7	0.0857143	0.857143	-0.10303	-0.309091	-0.284848	0.709091	-0.1		0.030303	-0.224242	0.0787879	-0.333333	0.0545455	-0.515152	0.648485	-0.0952381	0.633333	0.0857143	1	0.733333	0.878788	0	-0.345455	0.260606	-0.139394	0.05	-0.0857143	-0.309091	-0.333333	0.25		0.115152	0.151515	0.428571	0.0424242	-0.527273
30305	0.7	0.248485	0.175758	-0.433333	-0.1	0.47619	0.866667	0.0424242	0.139394	0.442424	0.030303	-0.8	-0.0857143	1	-0.357576	-0.612121	-0.745455	0.563636	-0.483333		-0.030303	-0.175758	0.10303	-0.551515	-0.139394	-0.587879	0.612121	-0.0238095	0.733333	-0.257143	0.733333	1	0.85	0	-0.454545	0.163636	-0.515152	-0.2	-0.542857	-0.0787879	-0.781818	0.0181818	1	-0.127273	0.151515	0.7	0.115152	-0.175758	0.5
30085	0.828571	-0.0666667	-0.212121	-0.515152	0.257143	0.516667	0.915152	0.0545455	0.236364	-0.2	-0.224242	-0.6	-0.371429	0.857143	-0.0424242	-0.10303	-0.260606	0.442424	-0.15		0.236364	-0.0909091	-0.0545455	-0.490909	-0.0545455	-0.454545	0.466667	-0.190476	0.383333	-0.371429	0.878788	0.85	1	0	-0.369697	0.321212	-0.29697	-0.0666667	-0.142857	-0.50303	-0.29697	0.5		0.0545455	0.163636	0.771429	0.10303	-0.490909
15699	-0.5	1	0.8	0.4		0.5	0	0.8	1	0.4	0.8			0.5	0.4	0.4	0.8	0.4	-0.2		0.2	0.4	0.4	-1	0.4	-0.2	0.8	0	0		0	0	0	1	0.6	-0.4	-0.2	0.5		0.8	-0.8	1		0.2	0	0.5	0.2	0.4
1505419	-0.0285714	0.572727	0.427273	0.345455	-0.542857	-0.0166667	-0.29697	-0.0454545	-0.0454545	-0.181818	0.163636	-0.1	-0.257143	-0.238095	0.0909091	0.5	0.427273	-0.0272727	-0.248485	1	-0.209091	0.436364	0.372727	0.0454545	0.736364	0.463636	-0.190909	-0.238095	-0.10303	0.6	-0.345455	-0.454545	-0.369697	0.6	1	-0.418182	0.109091	0.187879	-0.214286	0.490909	0.4	-0.333333	0.5	0.263636	0.0545455	-0.485714	0.254545	0.2	-1
14420	0.142857	-0.581818	-0.627273	-0.793939	-0.828571	0.5	0.309091	0.290909	0.345455	-0.1	-0.136364	-0.1	-0.657143	0.047619	-0.472727	0.172727	-0.172727	-0.363636	0.345455	-0.5	-0.172727	-0.345455	-0.772727	0.4	-0.6	0.3	-0.427273	-0.452381	-0.212121	-0.0857143	0.260606	0.163636	0.321212	-0.4	-0.418182	1	0.627273	0.309091	0.0714286	-0.227273	0.0181818	0.309091	-0.5	0.490909	-0.545455	0.371429	-0.709091	-0.836364	0.5
9877	-0.257143	-0.327273	-0.409091	-0.393939	-0.942857	0.25	-0.163636	0.427273	0.336364	-0.163636	0.0727273	0.6	-0.371429	-0.714286	-0.490909	0.290909	0.109091	-0.281818	0.248485	-1	-0.645455	-0.245455	-0.454545	0.581818	-0.318182	0.609091	-0.472727	-0.0952381	-0.236364	0.828571	-0.139394	-0.515152	-0.29697	-0.2	0.109091	0.627273	1	0.236364	0.25	0.0727273	0.445455	0.0181818	-0.5	0.636364	-0.363636	-0.542857	-0.709091	-0.554545	-0.5
14045	0.1	-0.10303	0.187879	0.25	-1	0.142857	-0.333333	0.418182	0.527273	-0.115152	0.212121	0.6	-0.8	0.178571	0.406061	0.369697	0.442424	-0.163636	0.4	-0.5	0.272727	-0.236364	-0.139394	0.2	0.151515	0.10303	-0.175758	-0.714286	-0.216667	0.0285714	0.05	-0.2	-0.0666667	0.5	0.187879	0.309091	0.236364	1	-0.607143	0.430303	-0.10303	0.533333	-0.5	0.248485	-0.551515	-0.1	-0.272727	-0.236364	0.5
7480	0.1	-0.464286	-0.5	-0.142857	0.8	-0.314286	-0.142857	-0.571429	-0.607143	-0.678571	-0.75	-0.8	0.8	-0.428571	-0.178571	-0.0357143	0.107143	-0.464286	0.142857	-0.5	-0.357143	0.107143	-0.178571	0.142857	-0.178571	0.285714	-0.321429	0.2	-0.428571	0.2	-0.0857143	-0.542857	-0.142857		-0.214286	0.0714286	0.25	-0.607143	1	-0.535714	0.857143	-0.657143		-0.214286	0.464286	-0.8	0.214286	0.107143
11936	-0.142857	0.454545	0.536364	0.454545	-0.828571	-0.05	-0.466667	0.1	0.1	0.136364	0.263636	0.1	-0.2	-0.0714286	-0.00909091	-0.0909091	-0.0636364	0.0636364	-0.284848	-0.5	-0.127273	-0.0272727	0.118182	0.145455	0.390909	0.0272727	0.0454545	-0.214286	0.2	0.257143	-0.309091	-0.0787879	-0.50303	0.8	0.490909	-0.227273	0.0727273	0.430303	-0.535714	1	-0.272727	-0.212121	0.5	0.0818182	-0.0909091	-0.657143	-0.0818182	0.118182	0.5
4260	0.0285714	-0.363636	-0.354545	0.10303	0.0857143	-0.3	-0.333333	0.0363636	-0.0454545	-0.527273	-0.254545	0.1	-0.0285714	-0.714286	0.00909091	0.427273	0.372727	-0.427273	0.0909091	-0.5	-0.227273	0.3	-0.0727273	0.490909	0.245455	0.509091	-0.645455	-0.0238095	-0.563636	0.257143	-0.333333	-0.781818	-0.29697	-0.8	0.4	0.0181818	0.445455	-0.10303	0.857143	-0.272727	1	-0.260606	-0.5	0.3	-0.00909091	-0.714286	0.0363636	0.00909091	-1
1214	-0.6	-0.357576	-0.2	-0.183333	-0.3	0.428571	0.266667	0.321212	0.406061	0.0424242	0.0545455	0.4	-0.485714	0.321429	0.563636	0.248485	0.321212	-0.10303	0.433333		0.478788	-0.212121	-0.321212	-0.381818	-0.393939	-0.115152	0.127273	-0.214286	-0.45	-0.371429	0.25	0.0181818	0.5	1	-0.333333	0.309091	0.0181818	0.533333	-0.657143	-0.212121	-0.260606	1	-1	0.127273	-0.0909091	0.9	-0.418182	-0.260606	0.5
1505373		1	1					-0.5	-0.5	0.5	0.5				-0.5	-0.5	-0.5	0.5			-0.5	0.5	1	-1	0.5	-0.5	0.5					1			0.5	-0.5	-0.5	-0.5		0.5	-0.5	-1	1	-1	0.5		1	1
1506370	0.2	-0.172727	-0.472727	-0.381818	-0.714286	0.4	0.260606	0.181818	0.245455	0.00909091	0.318182	-0.3	-0.542857	-0.190476	-0.354545	0.172727	-0.0545455	-0.0727273	-0.260606	-0.5	-0.236364	0.409091	-0.3	0.545455	0.0909091	0.590909	-0.409091	0.119048	-0.030303	0.6	0.115152	-0.127273	0.0545455	0.2	0.263636	0.490909	0.636364	0.248485	-0.214286	0.0818182	0.3	0.127273	-1	1	-0.436364	-0.485714	-0.563636	-0.772727	-0.5
1500897	-0.2	0.145455	0.0909091	0.0181818	0.657143	0.516667	0.2	-0.136364	-0.190909	-0.390909	-0.527273	-0.9	0.0285714	0.119048	0.0545455	-0.281818	-0.218182	0.272727	-0.309091	0.5	-0.0727273	-0.109091	0.209091	-0.645455	0.181818	-0.545455	0.481818	-0.214286	-0.115152	-0.6	0.151515	0.151515	0.163636	0	0.0545455	-0.545455	-0.363636	-0.551515	0.464286	-0.0909091	-0.00909091	-0.0909091	0.5	-0.436364	1	0.2	0.254545	0.427273	0.5
11678	0	0.0285714	0.142857	-0.714286	0.4	0.7	0.657143	-0.0285714	-0.0285714	0.257143	0.0857143		-0.8	0.7	0.428571	0.257143	0.371429	0.142857	0.828571		0.657143	-0.314286	-0.142857	-0.885714	-0.542857	-0.257143	0.771429	-0.4	0.0857143	-0.4	0.428571	0.7	0.771429	0.5	-0.485714	0.371429	-0.542857	-0.1	-0.8	-0.657143	-0.714286	0.9		-0.485714	0.2	1	-0.0857143	-0.0285714
14373	0.6	0.490909	0.627273	0.624242	0.6	-0.616667	-0.0666667	-0.136364	-0.118182	0.109091	0.0454545	0	0.6	0.0952381	0.309091	-0.136364	0.0727273	0.372727	-0.333333	0.5	0.145455	0.281818	0.790909	-0.3	0.609091	-0.363636	0.309091	0.190476	0.284848	0.0285714	0.0424242	0.115152	0.10303	0.2	0.254545	-0.709091	-0.709091	-0.272727	0.214286	-0.0818182	0.0363636	-0.418182	1	-0.563636	0.254545	-0.0857143	1	0.709091	-0.5
1505637	-0.371429	0.372727	0.627273	0.769697	0.485714	-0.75	-0.636364	-0.109091	-0.236364	0.154545	0.0363636	1	0.485714	-0.452381	0.472727	-0.1	0.227273	0.109091	-0.0545455	0.5	0.118182	0.0272727	0.636364	-0.363636	0.272727	-0.336364	0.272727	0.190476	-0.00606061	-0.542857	-0.527273	-0.175758	-0.490909	0.4	0.2	-0.836364	-0.554545	-0.236364	0.107143	0.118182	0.00909091	-0.260606	1	-0.772727	0.427273	-0.0285714	0.709091	1	-0.5
1505464		-0.5	-0.5					-1	-0.5	-0.5	-1				-0.5	-0.5	-0.5	-0.5	0.5		0.5	-1	-0.5	-0.5	-0.5	-0.5	0.5		0.5			0.5			-1	0.5	-0.5	0.5		0.5	-1	0.5		-0.5	0.5		-0.5	-0.5	1
12605	0.371429	0.309091	0.490909	0.563636	0.771429	-0.683333	-0.151515	-0.263636	-0.290909	0.0363636	-0.136364	-0.1	0.714286	0	0.309091	-0.154545	0.0636364	0.2	-0.115152	0.5	0.2	0.136364	0.627273	-0.3	0.363636	-0.4	0.245455	0.214286	0.127273	-0.371429	-0.0666667	0.0545455	0.0181818	-0.4	0.0363636	-0.663636	-0.718182	-0.430303	0.607143	-0.218182	0.0454545	-0.442424	1	-0.754545	0.318182	0.142857	0.936364	0.781818	-0.5
15427	0.2	0.316667	0.2	0	-1	-0.678571	-0.357143	0.133333	0.0333333	0.65	0.65	1	0	-0.771429	-0.566667	-0.166667	-0.283333	0.0166667	-0.404762		-0.55	0.266667	0.0833333	0.683333	-0.0333333	0.55	-0.45	0.485714	0.619048	0.8	-0.52381	0.0238095	-0.571429		0.183333	0.216667	0.433333	-0.116667	-0.142857	0.2	0.0333333	-0.761905	1	0.3	-0.583333	-0.6	0.0166667	-0.116667	-0.5
1505742	-0.2	-0.571429	-0.571429	-0.107143	0.9	0	0.0714286	-0.678571	-0.714286	-0.357143	-0.857143	-1	0.257143	0.314286	0.142857	-0.392857	-0.464286	-0.571429	0.0285714		0.821429	0	-0.714286	-0.107143	-0.428571	-0.428571	-0.214286	-0.0857143	-0.142857	-0.8	-0.142857	0.214286	0		-0.464286	-0.107143	-0.714286	-0.657143	0.4	-0.0714286	-0.25	-0.0714286		-0.535714	0.392857	-0.2	-0.107143	0.285714
7629	0.4	-0.0166667	0.516667	0.5	0.6	-0.642857	-0.261905	0.166667	0.166667	-0.0666667	-0.233333	0.5	0.2	0.142857	0.616667	0.116667	0.4	-0.0666667	0.571429		0.4	-0.183333	0.35	-0.466667	0.15	-0.433333	0.15	-0.314286	-0.285714	-0.4	0	0.047619	0.166667	1	-0.2	-0.25	-0.566667	0.190476	0.2	-0.166667	0	0.238095	1	-0.8	0.133333	0.6	0.683333	0.633333	-0.5
21046	-0.7	-0.619048	-0.714286	-0.547619	0.3	0.0357143	-0.0238095	-0.0952381	-0.142857	0.428571	-0.0238095	-0.5	-0.2	0.0857143	-0.285714	-0.285714	-0.571429	-0.595238	-0.25		0.380952	0.238095	-0.785714	0.142857	-0.761905	0.0714286	-0.5	0.142857	-0.285714	-0.371429	-0.47619	0.392857	-0.0714286	-0.5	-0.47619	0.452381	-0.166667	-0.428571	-0.1	-0.238095	-0.261905	0.214286		0.047619	-0.261905	0.314286	-0.357143	-0.190476
1505793		0.2	0.2	1		-0.8	-0.8	0	0	0.2	0.4		1	-1	0.2	0.4	0.2	0	-0.5		-0.4	0.8	0.8	0.8	0.8	0.8	-0.6	1	-1	0.5	-0.8	-1	-1		1	-1	0.4	-0.4		-0.4	1	-0.8		0.2	-0.4		0.8	0.8
2009	-0.5	-0.2	0.142857	0.714286	1	-0.9	-0.885714	-0.142857	-0.257143	-0.371429	-0.142857	-0.5	1	-0.8	0.314286	-0.257143	0.0285714	-0.2	-0.485714		0.0857143	0.371429	0.371429	0.542857	0.542857	0.0285714	-0.6	0.2	-0.542857	0.4	-0.771429	-0.885714	-0.942857	-0.5	0.428571	-0.771429	-0.0857143	-0.314286	0.4	0.257143	0.771429	-0.542857		-0.0857143	0.485714	-1	0.771429	0.657143
[truncated: 7 more columns]

## Sheet: Cluster 800 bladder (P value)
Peptde ID	1504804	22220	21893	23484	23179	1504736	29788	17342	17670	20534	20796	16953	1506112	28549	14770	18733	20002	27161	18461	14341	15130	16417	27388	1506395	16079	18174	26939	1504911	9232	1506221	1504723	30305	30085	15699	1505419	14420	9877	14045	7480	11936	4260	1214	1505373	1506370	1500897	11678	14373	1505637	1505464
1504804		0.497222	0.713889	1	1	1	0.0583333	1	0.563889	0.563889	1	0.333333	0.916667	0.136111	0.802778	0.802778	0.919444	0.297222	0.713889		1	0.919444	0.355556	0.802778	0.241667	0.713889	0.919444	1	0.297222	1	0.0333333	0.233333	0.0583333	1	1	0.802778	0.658333	0.95	0.95	0.802778	1	0.35		0.713889	0.713889	1	0.241667	0.497222
22220	0.497222		0.00329926	0.29566	0.658333	0.708069	0.918376	0.73453	0.775854	0.299297	0.192777	0.95	0.802778	0.619097	0.967308	0.924139	0.73453	0.081814	0.232537	1	0.539314	0.633662	0.0181946	0.224952	0.107249	0.989466	0.114179	0.500794	0.03056	0.102778	0.97296	0.491768	0.865144	0.0833333	0.0708157	0.0656118	0.326857	0.785023	0.302381	0.163496	0.27305	0.312895	0.333333	0.614656	0.673116	1	0.129365	0.26075	1
21893	0.713889	0.00329926		0.0267521	0.355556	0.249917	0.348741	0.65381	0.65381	0.341517	0.26075	0.35	0.919444	0.840129	0.402349	0.881201	0.539314	0.114179	0.560276	1	0.796393	0.73453	0.00744268	0.26075	0.114179	0.402349	0.0939164	1	0.113854	0.658333	0.865144	0.632142	0.560276	0.333333	0.192777	0.0439863	0.214077	0.607316	0.266667	0.0939164	0.286222	0.583658	0.333333	0.145713	0.796393	0.802778	0.0439863	0.0439863	1
23484	1	0.29566	0.0267521		0.802778	0.0107694	0.0806057	0.682089	0.707164	0.733007	0.46973	0.45	0.0333333	0.427877	0.0438024	0.682089	0.29566	0.583658	0.843182		0.367892	0.46973	0.0267521	0.758931	0.066735	0.632142	0.656714	0.461806	0.948391	1	0.386906	0.249917	0.133401	0.75	0.330407	0.00877811	0.26316	0.520635	0.802778	0.19124	0.785023	0.64364		0.278828	0.97296	0.136111	0.0603158	0.0125568
23179	1	0.658333	0.355556	0.802778		0.919444	0.658333	0.102778	0.102778	0.297222	0.175	0.333333	0.416667	0.497222	0.241667	0.713889	0.713889	1	0.802778		0.00277778	0.241667	0.802778	0.658333	1	0.0333333	0.658333	0.35	1	0.333333	0.419444	0.95	0.658333		0.297222	0.0583333	0.0166667	0.0166667	0.333333	0.0583333	0.919444	0.683333		0.136111	0.175	0.75	0.241667	0.355556
1504736	1	0.708069	0.249917	0.0107694	0.919444		0.0503197	0.493331	0.385323	0.212522	0.358581	0.233333	0.175	0.243056	0.249917	0.948391	0.3125	0.743541	0.840129		0.64364	0.249917	0.1618	0.1618	0.551709	0.462991	0.41008	0.0480159	0.793006	0.683333	0.1938	0.243056	0.1618	1	0.98157	0.177662	0.520635	0.752034	0.563889	0.911618	0.436624	0.299206		0.291193	0.1618	0.233333	0.0857253	0.0254905
29788	0.0583333	0.918376	0.348741	0.0806057	0.658333	0.0503197		0.707164	0.918376	0.632142	0.682089	0.233333	0.658333	0.00223214	0.46973	0.656714	0.29566	0.154822	0.551709		0.811283	0.891624	0.785023	0.278828	0.838226	0.46973	0.19124	0.934871	0.177662	0.919444	0.00286321	0.00450838	0.000532959	1	0.406912	0.386906	0.656714	0.385323	0.802778	0.17862	0.348741	0.493331		0.46973	0.583658	0.175	0.865144	0.0544307
17342	1	0.73453	0.65381	0.682089	0.102778	0.493331	0.707164		1.38789e-05	0.595046	0.451077	0.45	0.419444	0.500794	0.693713	0.633662	0.754517	0.371335	0.785023	1	0.114179	0.182568	0.713582	0.881201	0.860333	0.539314	0.65381	0.196627	0.865144	0.919444	0.733007	0.918376	0.891624	0.333333	0.903251	0.386337	0.192777	0.232537	0.2	0.775854	0.924139	0.367892	1	0.595046	0.693713	1	0.693713	0.754517	0.333333
17670	0.563889	0.775854	0.65381	0.707164	0.102778	0.385323	0.918376	1.38789e-05		0.693713	0.485354	0.683333	0.419444	1	0.817929	0.673116	0.73453	0.286222	0.733007	1	0.26075	0.236622	0.754517	0.989466	0.946204	0.451077	0.557412	0.243056	0.707164	0.919444	0.367892	0.707164	0.513475	0.0833333	0.903251	0.299297	0.313186	0.123102	0.166667	0.775854	0.903251	0.247471	1	0.468404	0.576535	1	0.73453	0.485354	1
20534	0.563889	0.299297	0.341517	0.733007	0.297222	0.212522	0.632142	0.595046	0.693713		0.00182585	0.35	0.713889	0.664583	0.817929	0.286222	0.520777	0.299297	0.406912	1	0.903251	0.595046	0.248318	0.946204	0.595046	0.924139	0.468404	0.0575893	0.154822	0.497222	0.536661	0.204438	0.583658	0.75	0.595046	0.775854	0.633662	0.758931	0.109524	0.693713	0.100311	0.918376	1	0.989466	0.236622	0.658333	0.754517	0.65381	1
20796	1	0.192777	0.26075	0.46973	0.175	0.358581	0.682089	0.451077	0.485354	0.00182585		0.233333	0.802778	0.500794	0.860333	0.775854	0.73453	0.236622	0.632142	1	0.754517	0.341517	0.129365	0.557412	0.775854	0.468404	0.633662	0.0961806	0.247471	0.0333333	0.707164	0.94597	0.536661	0.333333	0.633662	0.693713	0.838493	0.560276	0.0662698	0.434825	0.451077	0.891624	1	0.341517	0.100311	0.919444	0.903251	0.924139	0.333333
16953	0.333333	0.95	0.35	0.45	0.333333	0.233333	0.233333	0.45	0.683333	0.35	0.233333			0.233333	0.45	0.516667	0.233333	0.95	0.35		0.35	0.35	0.45	1	0.45	0.233333	0.95	0.75	0.95		0.233333	0.333333	0.35		0.95	0.95	0.35	0.35	0.333333	0.95	0.95	0.75		0.683333	0.0833333		1	0.0166667
1506112	0.916667	0.802778	0.919444	0.0333333	0.416667	0.175	0.658333	0.419444	0.419444	0.713889	0.802778			1	0.355556	0.136111	0.919444	0.497222	0.95		0.658333	0.919444	0.297222	0.355556	1	0.563889	0.658333	0.0833333	0.45	0.683333	0.919444	0.919444	0.497222		0.658333	0.175	0.497222	0.133333	0.333333	0.713889	1	0.355556		0.297222	1	0.333333	0.241667	0.355556
28549	0.136111	0.619097	0.840129	0.427877	0.497222	0.243056	0.00223214	0.500794	1	0.664583	0.500794	0.233333	1		0.881994	0.619097	0.26746	0.359871	0.840129		0.0830853	0.934871	0.840129	0.132292	0.703323	0.0575893	0.151141	0.555952	0.216171	0.75	0.0107143	0.000396825	0.0107143	1	0.582143	0.934871	0.0575893	0.713095	0.419444	0.881994	0.0575893	0.497619		0.664583	0.793006	0.233333	0.840129	0.26746
14770	0.802778	0.967308	0.402349	0.0438024	0.241667	0.249917	0.46973	0.693713	0.817929	0.817929	0.860333	0.45	0.355556	0.881994		0.468404	0.0439863	0.860333	0.312895	1	0.0127743	0.754517	0.402349	0.355967	0.468404	0.576535	0.65381	0.840129	0.232537	0.297222	0.785023	0.312895	0.918376	0.75	0.796393	0.145713	0.129365	0.247471	0.713095	0.989466	0.989466	0.0962787	1	0.286222	0.881201	0.419444	0.355967	0.145713	1
18733	0.802778	0.924139	0.881201	0.682089	0.713889	0.948391	0.656714	0.633662	0.673116	0.286222	0.775854	0.516667	0.136111	0.619097	0.468404		0.00329926	0.081814	0.0544307	1	0.775854	0.860333	0.520777	0.989466	0.989466	0.0181946	0.137529	0.243056	0.104883	0.563889	0.386906	0.066735	0.785023	0.75	0.121732	0.614656	0.386337	0.29566	0.963492	0.796393	0.192777	0.491768	1	0.614656	0.402349	0.658333	0.693713	0.775854	1
20002	0.919444	0.73453	0.539314	0.29566	0.713889	0.3125	0.29566	0.754517	0.73453	0.520777	0.73453	0.233333	0.919444	0.26746	0.0439863	0.00329926		0.402349	0.03056	1	0.503396	0.967308	0.673116	0.860333	0.73453	0.129365	0.595046	0.976786	0.19124	0.563889	0.427082	0.0174058	0.46973	0.333333	0.192777	0.614656	0.754517	0.204438	0.839683	0.860333	0.26075	0.367892	1	0.881201	0.520777	0.497222	0.838493	0.503396	1
27161	0.297222	0.081814	0.114179	0.583658	1	0.743541	0.154822	0.371335	0.286222	0.299297	0.236622	0.95	0.497222	0.359871	0.860333	0.081814	0.402349		0.154822	1	0.434825	0.860333	0.0181946	0.236622	0.299297	0.100311	0.00115781	0.170982	0.00159998	0.241667	0.0267521	0.0962787	0.204438	0.75	0.946204	0.27305	0.402349	0.656714	0.302381	0.860333	0.192777	0.785023	1	0.838493	0.418129	0.802778	0.26075	0.754517	1
18461	0.713889	0.232537	0.560276	0.843182	0.802778	0.840129	0.551709	0.785023	0.733007	0.406912	0.632142	0.35	0.95	0.840129	0.312895	0.0544307	0.03056	0.154822		1	0.491768	0.123102	0.218201	0.865144	0.123102	0.46973	0.632142	0.619097	0.166283	0.95	0.809981	0.1938	0.708069	0.916667	0.491768	0.330407	0.491768	0.291193	0.78254	0.427082	0.811283	0.249917		0.46973	0.386906	0.0583333	0.348741	0.891624	1
14341		1	1					1	1	1	1				1	1	1	1	1		1	1	1	0.333333	1	1	1		1						0.333333	1	0.333333	1	1	1	1			1	1		1	1
15130	1	0.539314	0.796393	0.367892	0.00277778	0.64364	0.811283	0.114179	0.26075	0.903251	0.754517	0.35	0.658333	0.0830853	0.0127743	0.775854	0.503396	0.434825	0.491768	1		0.386337	0.73453	0.539314	0.903251	0.576535	0.946204	0.881994	0.367892	0.0583333	0.94597	0.94597	0.513475	0.916667	0.539314	0.614656	0.0368481	0.448277	0.444444	0.713582	0.503396	0.166283	1	0.485354	0.838493	0.175	0.673116	0.73453	1
16417	0.919444	0.633662	0.73453	0.46973	0.241667	0.249917	0.891624	0.182568	0.236622	0.595046	0.341517	0.35	0.919444	0.934871	0.754517	0.860333	0.967308	0.860333	0.123102	1	0.386337		0.451077	0.434825	0.107249	0.27305	0.341517	0.170982	0.94597	0.297222	0.536661	0.632142	0.811283	0.75	0.182568	0.299297	0.468404	0.513475	0.839683	0.946204	0.371335	0.560276	1	0.214077	0.754517	0.563889	0.402349	0.946204	0.333333
27388	0.355556	0.0181946	0.00744268	0.0267521	0.802778	0.1618	0.785023	0.713582	0.754517	0.248318	0.129365	0.45	0.297222	0.840129	0.402349	0.520777	0.673116	0.0181946	0.218201	1	0.73453	0.451077		0.371335	0.0477574	0.418129	0.0760923	0.170982	0.133401	0.0583333	0.838226	0.785023	0.891624	0.75	0.26075	0.00744268	0.163496	0.707164	0.713095	0.73453	0.838493	0.367892	0.333333	0.371335	0.539314	0.802778	0.00549127	0.0402487	1
1506395	0.802778	0.224952	0.26075	0.758931	0.658333	0.1618	0.278828	0.881201	0.989466	0.946204	0.557412	1	0.355556	0.132292	0.355967	0.989466	0.860333	0.236622	0.865144	0.333333	0.539314	0.434825	0.371335		0.989466	0.081814	0.0144001	0.536409	0.811283	0.419444	0.348741	0.104883	0.154822	0.0833333	0.903251	0.224952	0.0656118	0.583658	0.78254	0.673116	0.129365	0.278828	0.333333	0.0876368	0.0368481	0.0333333	0.371335	0.27305	1
16079	0.241667	0.107249	0.114179	0.066735	1	0.551709	0.838226	0.860333	0.946204	0.595046	0.775854	0.45	1	0.703323	0.468404	0.989466	0.73453	0.299297	0.123102	1	0.903251	0.107249	0.0477574	0.989466		0.881201	0.73453	0.934871	0.46973	0.419444	0.891624	0.707164	0.891624	0.75	0.0127743	0.0562284	0.341517	0.682089	0.713095	0.236622	0.468404	0.26316	1	0.796393	0.595046	0.297222	0.0519132	0.418129	1
18174	0.713889	0.989466	0.402349	0.632142	0.0333333	0.462991	0.46973	0.539314	0.451077	0.924139	0.468404	0.233333	0.563889	0.0575893	0.576535	0.0181946	0.129365	0.100311	0.46973	1	0.576535	0.27305	0.418129	0.081814	0.881201		0.0181946	0.752034	0.448277	0.102778	0.133401	0.0806057	0.19124	0.916667	0.154576	0.371335	0.0519132	0.785023	0.555952	0.946204	0.114179	0.758931	1	0.060891	0.0876368	0.658333	0.27305	0.313186	1
26939	0.919444	0.114179	0.0939164	0.656714	0.658333	0.41008	0.19124	0.65381	0.557412	0.468404	0.633662	0.95	0.658333	0.151141	0.65381	0.137529	0.595046	0.00115781	0.632142	1	0.946204	0.341517	0.0760923	0.0144001	0.73453	0.0181946		0.536409	0.0438024	0.919444	0.0489787	0.066735	0.17862	0.333333	0.576535	0.192777	0.145713	0.632142	0.497619	0.903251	0.0368481	0.733007	1	0.214077	0.137529	0.102778	0.355967	0.418129	1
1504911	1	0.500794	1	0.461806	0.35	0.0480159	0.934871	0.196627	0.243056	0.0575893	0.0961806	0.75	0.0833333	0.555952	0.840129	0.243056	0.976786	0.170982	0.619097		0.881994	0.170982	0.170982	0.536409	0.934871	0.752034	0.536409		0.326835	0.516667	0.840129	0.976786	0.664583	1	0.582143	0.26746	0.840129	0.0880952	0.783333	0.619097	0.976786	0.619097		0.793006	0.619097	0.516667	0.664583	0.664583
9232	0.297222	0.03056	0.113854	0.948391	1	0.793006	0.177662	0.865144	0.707164	0.154822	0.247471	0.95	0.45	0.216171	0.232537	0.104883	0.19124	0.00159998	0.166283	1	0.367892	0.94597	0.133401	0.811283	0.46973	0.448277	0.0438024	0.326835		0.0833333	0.0760362	0.0311232	0.3125	1	0.785023	0.560276	0.513475	0.580941	0.353571	0.583658	0.0962787	0.229817		0.94597	0.758931	0.919444	0.427082	1	1
1506221	1	0.102778	0.658333	1	0.333333	0.683333	0.919444	0.919444	0.919444	0.497222	0.0333333		0.683333	0.75	0.297222	0.563889	0.563889	0.241667	0.95		0.0583333	0.297222	0.0583333	0.419444	0.419444	0.102778	0.919444	0.516667	0.0833333		0.919444	0.658333	0.497222		0.241667	0.919444	0.0583333	1	0.916667	0.658333	0.658333	0.497222		0.241667	0.241667	0.75	1	0.297222
1504723	0.0333333	0.97296	0.865144	0.386906	0.419444	0.1938	0.00286321	0.733007	0.367892	0.536661	0.707164	0.233333	0.919444	0.0107143	0.785023	0.386906	0.427082	0.0267521	0.809981		0.94597	0.536661	0.838226	0.348741	0.891624	0.133401	0.0489787	0.840129	0.0760362	0.919444		0.0311232	0.00159998	1	0.330407	0.46973	0.707164	0.911618	0.919444	0.386906	0.348741	0.520635		0.758931	0.682089	0.419444	0.918376	0.123102
30305	0.233333	0.491768	0.632142	0.249917	0.95	0.243056	0.00450838	0.918376	0.707164	0.204438	0.94597	0.333333	0.919444	0.000396825	0.312895	0.066735	0.0174058	0.0962787	0.1938		0.94597	0.632142	0.785023	0.104883	0.707164	0.0806057	0.066735	0.976786	0.0311232	0.658333	0.0311232		0.00607363	1	0.19124	0.656714	0.133401	0.613404	0.297222	0.838226	0.0105308	0.97296	0.333333	0.733007	0.682089	0.233333	0.758931	0.632142	1
30085	0.0583333	0.865144	0.560276	0.133401	0.658333	0.1618	0.000532959	0.891624	0.513475	0.583658	0.536661	0.35	0.497222	0.0107143	0.918376	0.785023	0.46973	0.204438	0.708069		0.513475	0.811283	0.891624	0.154822	0.891624	0.19124	0.17862	0.664583	0.3125	0.497222	0.00159998	0.00607363		1	0.29566	0.367892	0.406912	0.880093	0.802778	0.144027	0.406912	0.177662		0.891624	0.656714	0.102778	0.785023	0.154822
15699	1	0.0833333	0.333333	0.75		1	1	0.333333	0.0833333	0.75	0.333333			1	0.75	0.75	0.333333	0.75	0.916667		0.916667	0.75	0.75	0.0833333	0.75	0.916667	0.333333	1	1		1	1	1		0.416667	0.75	0.916667	1		0.333333	0.333333	0.0833333		0.916667	1	1	0.916667	0.75
1505419	1	0.0708157	0.192777	0.330407	0.297222	0.98157	0.406912	0.903251	0.903251	0.595046	0.633662	0.95	0.658333	0.582143	0.796393	0.121732	0.192777	0.946204	0.491768	0.333333	0.539314	0.182568	0.26075	0.903251	0.0127743	0.154576	0.576535	0.582143	0.785023	0.241667	0.330407	0.19124	0.29566	0.416667		0.203041	0.754517	0.607316	0.661508	0.129365	0.224952	0.348741	1	0.434825	0.881201	0.355556	0.451077	0.557412	0.333333
14420	0.802778	0.0656118	0.0439863	0.00877811	0.0583333	0.177662	0.386906	0.386337	0.299297	0.775854	0.693713	0.95	0.175	0.934871	0.145713	0.614656	0.614656	0.27305	0.330407	1	0.614656	0.299297	0.00744268	0.224952	0.0562284	0.371335	0.192777	0.26746	0.560276	0.919444	0.46973	0.656714	0.367892	0.75	0.203041		0.0439863	0.386906	0.906349	0.503396	0.967308	0.386906	1	0.129365	0.0876368	0.497222	0.0181946	0.00223705	1
9877	0.658333	0.326857	0.214077	0.26316	0.0166667	0.520635	0.656714	0.192777	0.313186	0.633662	0.838493	0.35	0.497222	0.0575893	0.129365	0.386337	0.754517	0.402349	0.491768	0.333333	0.0368481	0.468404	0.163496	0.0656118	0.341517	0.0519132	0.145713	0.840129	0.513475	0.0583333	0.707164	0.133401	0.406912	0.916667	0.754517	0.0439863		0.513475	0.594841	0.838493	0.17304	0.97296	1	0.0402487	0.27305	0.297222	0.0181946	0.081814	1
14045	0.95	0.785023	0.607316	0.520635	0.0166667	0.752034	0.385323	0.232537	0.123102	0.758931	0.560276	0.35	0.133333	0.713095	0.247471	0.29566	0.204438	0.656714	0.291193	1	0.448277	0.513475	0.707164	0.583658	0.682089	0.785023	0.632142	0.0880952	0.580941	1	0.911618	0.613404	0.880093	1	0.607316	0.386906	0.513475		0.166667	0.218201	0.785023	0.147525	1	0.491768	0.104883	0.95	0.448277	0.513475	1
7480	0.95	0.302381	0.266667	0.802778	0.333333	0.563889	0.802778	0.2	0.166667	0.109524	0.0662698	0.333333	0.333333	0.419444	0.713095	0.963492	0.839683	0.302381	0.78254	1	0.444444	0.839683	0.713095	0.78254	0.713095	0.555952	0.497619	0.783333	0.353571	0.916667	0.919444	0.297222	0.802778		0.661508	0.906349	0.594841	0.166667		0.235714	0.0238095	0.175		0.661508	0.302381	0.333333	0.661508	0.839683
11936	0.802778	0.163496	0.0939164	0.19124	0.0583333	0.911618	0.17862	0.775854	0.775854	0.693713	0.434825	0.95	0.713889	0.881994	0.989466	0.796393	0.860333	0.860333	0.427082	1	0.713582	0.946204	0.73453	0.673116	0.236622	0.946204	0.903251	0.619097	0.583658	0.658333	0.386906	0.838226	0.144027	0.333333	0.129365	0.503396	0.838493	0.218201	0.235714		0.418129	0.560276	1	0.817929	0.796393	0.175	0.817929	0.73453	1
4260	1	0.27305	0.286222	0.785023	0.919444	0.436624	0.348741	0.924139	0.903251	0.100311	0.451077	0.95	1	0.0575893	0.989466	0.192777	0.26075	0.192777	0.811283	1	0.503396	0.371335	0.838493	0.129365	0.468404	0.114179	0.0368481	0.976786	0.0962787	0.658333	0.348741	0.0105308	0.406912	0.333333	0.224952	0.967308	0.17304	0.785023	0.0238095	0.418129		0.46973	1	0.371335	0.989466	0.136111	0.924139	0.989466	0.333333
1214	0.35	0.312895	0.583658	0.64364	0.683333	0.299206	0.493331	0.367892	0.247471	0.918376	0.891624	0.75	0.355556	0.497619	0.0962787	0.491768	0.367892	0.785023	0.249917		0.166283	0.560276	0.367892	0.278828	0.26316	0.758931	0.733007	0.619097	0.229817	0.497222	0.520635	0.97296	0.177662	0.0833333	0.348741	0.386906	0.97296	0.147525	0.175	0.560276	0.46973		0.333333	0.733007	0.811283	0.0833333	0.232537	0.46973	1
1505373		0.333333	0.333333					1	1	1	1				1	1	1	1			1	1	0.333333	0.333333	1	1	1					0.333333			1	1	1	1		1	1	0.333333		0.333333	1		0.333333	0.333333
1506370	0.713889	0.614656	0.145713	0.278828	0.136111	0.291193	0.46973	0.595046	0.468404	0.989466	0.341517	0.683333	0.297222	0.664583	0.286222	0.614656	0.881201	0.838493	0.46973	1	0.485354	0.214077	0.371335	0.0876368	0.796393	0.060891	0.214077	0.793006	0.94597	0.241667	0.758931	0.733007	0.891624	0.916667	0.434825	0.129365	0.0402487	0.491768	0.661508	0.817929	0.371335	0.733007	0.333333		0.182568	0.355556	0.0760923	0.00744268	1
1500897	0.713889	0.673116	0.796393	0.97296	0.175	0.1618	0.583658	0.693713	0.576535	0.236622	0.100311	0.0833333	1	0.793006	0.881201	0.402349	0.520777	0.418129	0.386906	1	0.838493	0.754517	0.539314	0.0368481	0.595046	0.0876368	0.137529	0.619097	0.758931	0.241667	0.682089	0.682089	0.656714	1	0.881201	0.0876368	0.27305	0.104883	0.302381	0.796393	0.989466	0.811283	1	0.182568		0.713889	0.451077	0.192777	1
11678	1	1	0.802778	0.136111	0.75	0.233333	0.175	1	1	0.658333	0.919444		0.333333	0.233333	0.419444	0.658333	0.497222	0.802778	0.0583333		0.175	0.563889	0.802778	0.0333333	0.297222	0.658333	0.102778	0.516667	0.919444	0.75	0.419444	0.233333	0.102778	1	0.355556	0.497222	0.297222	0.95	0.333333	0.175	0.136111	0.0833333		0.355556	0.713889		0.919444	1
14373	0.241667	0.129365	0.0439863	0.0603158	0.241667	0.0857253	0.865144	0.693713	0.73453	0.754517	0.903251	1	0.241667	0.840129	0.355967	0.693713	0.838493	0.26075	0.348741	1	0.673116	0.402349	0.00549127	0.371335	0.0519132	0.27305	0.355967	0.664583	0.427082	1	0.918376	0.758931	0.785023	0.916667	0.451077	0.0181946	0.0181946	0.448277	0.661508	0.817929	0.924139	0.232537	0.333333	0.0760923	0.451077	0.919444		0.0181946	1
1505637	0.497222	0.26075	0.0439863	0.0125568	0.355556	0.0254905	0.0544307	0.754517	0.485354	0.65381	0.924139	0.0166667	0.355556	0.26746	0.145713	0.775854	0.503396	0.754517	0.891624	1	0.73453	0.946204	0.0402487	0.27305	0.418129	0.313186	0.418129	0.664583	1	0.297222	0.123102	0.632142	0.154822	0.75	0.557412	0.00223705	0.081814	0.513475	0.839683	0.73453	0.989466	0.46973	0.333333	0.00744268	0.192777	1	0.0181946		1
1505464		1	1					0.333333	1	1	0.333333				1	1	1	1	1		1	0.333333	1	1	1	1	1		1			1			0.333333	1	1	1		1	0.333333	1		1	1		1	1
12605	0.497222	0.355967	0.129365	0.0962787	0.102778	0.0503197	0.682089	0.434825	0.386337	0.924139	0.693713	0.95	0.136111	1	0.355967	0.65381	0.860333	0.557412	0.758931	1	0.557412	0.693713	0.0439863	0.371335	0.27305	0.224952	0.468404	0.619097	0.733007	0.497222	0.865144	0.891624	0.97296	0.75	0.924139	0.0306113	0.0162335	0.218201	0.166667	0.520777	0.903251	0.204438	0.333333	0.00984598	0.341517	0.802778	8.10686e-05	0.00639711	1
15427	0.916667	0.41008	0.613404	1	0.0833333	0.109524	0.389385	0.743541	0.948391	0.0665619	0.0665619	0.0833333	1	0.102778	0.120574	0.677745	0.462991	0.98157	0.326835		0.132777	0.493331	0.843182	0.0503197	0.948391	0.132777	0.229817	0.355556	0.11498	0.133333	0.196627	0.976786	0.151141		0.64364	0.580941	0.249917	0.775628	0.802778	0.613404	0.948391	0.036756	0.333333	0.436624	0.107997	0.416667	0.98157	0.775628	1
1505742	0.916667	0.2	0.2	0.839683	0.0833333	1	0.906349	0.109524	0.0880952	0.444444	0.0238095	0.333333	0.658333	0.563889	0.78254	0.395635	0.302381	0.2	1		0.034127	1	0.0880952	0.839683	0.353571	0.353571	0.661508	0.919444	0.802778	0.133333	0.78254	0.661508	1		0.302381	0.839683	0.0880952	0.175	0.75	0.906349	0.594841	0.906349		0.235714	0.395635	0.916667	0.839683	0.555952
7629	0.75	0.98157	0.1618	0.216171	0.416667	0.138889	0.536409	0.677745	0.677745	0.880093	0.551709	1	0.916667	0.802778	0.0857253	0.775628	0.291193	0.880093	0.151141		0.291193	0.64364	0.358581	0.212522	0.708069	0.249917	0.708069	0.563889	0.500794	0.75	1	0.934871	0.703323	0.333333	0.613404	0.520635	0.120574	0.664583	0.783333	0.677745	1	0.582143	0.333333	0.0138283	0.743541	0.35	0.0503197	0.0760362	1
21046	0.233333	0.11498	0.0575893	0.170982	0.683333	0.963492	0.976786	0.840129	0.752034	0.299206	0.976786	1	0.713889	0.919444	0.500794	0.500794	0.151141	0.132292	0.594841		0.359871	0.582143	0.0279266	0.752034	0.036756	0.881994	0.216171	0.802778	0.555952	0.497222	0.243056	0.395635	0.881994	1	0.243056	0.26746	0.703323	0.353571	0.95	0.582143	0.536409	0.661508		0.934871	0.536409	0.563889	0.389385	0.664583
1505793		0.916667	0.916667	0.0833333		0.333333	0.333333	1	1	0.916667	0.75		0.333333	0.333333	0.916667	0.75	0.916667	1	1		0.75	0.333333	0.333333	0.333333	0.333333	0.333333	0.416667	0.333333	0.333333	1	0.333333	0.0833333	0.0833333		0.0833333	0.0833333	0.75	0.75		0.75	0.0833333	0.333333		0.916667	0.75		0.333333	0.333333
2009	1	0.713889	0.802778	0.136111	0.333333	0.0833333	0.0333333	0.802778	0.658333	0.497222	0.802778	1	0.333333	0.133333	0.563889	0.658333	1	0.713889	0.355556		0.919444	0.497222	0.497222	0.297222	0.297222	1	0.241667	0.713889	0.297222	0.75	0.102778	0.0333333	0.0166667	1	0.419444	0.102778	0.919444	0.563889	0.75	0.658333	0.102778	0.297222		0.919444	0.355556	0.0833333	0.102778	0.175
[truncated: 7 more columns]
